# Supplementary material for: Evidence from a Systematic Review and Meta-Analysis Pointing to the Antidiabetic Effect of Polyphenol-Rich Plant Extracts from Gymnema montanum, Momordica charantia and Moringa oleifera
Source: MDPI journal article supplement (doi:10.3390/cimb44020049), 2022-01-28
Supplement: s1 [file s1]

## Supplementary Material

**Title:** Evidence from a Systematic Review and Meta-Analysis Pointing to the Antidiabetic Effect of the Polyphenol-Rich Plant Extracts from *Gymnema montanum*, *Momordica charantia* and *Moringa oleifera*.

**Authors:** Michal Krawczyk<sup>1</sup>, Izabela Burzynska-Pedziwiatr<sup>1</sup>, Lucyna Alicja Wozniak<sup>1</sup>, Malgorzata Bukowiecka-Matusiak<sup>1\*</sup>

<sup>1</sup> Chair of Medical Biology, Laboratory of Metabolomic Studies, Department of Structural Biology, Faculty of Medicine, Faculty of Biomedical Sciences, Medical University of Lodz, Zeligowskiego 7/9, 90-752 Lodz, Poland; michal.s.krawczyk@gmail.com; izabela.burzynska-pedziwiatr@umed.lodz.pl; lucyna.wozniak@umed.lodz.pl;

\* Correspondence: malgorzata.bukowiecka-matusiak@umed.lodz.pl; Tel.: +48 422725240

### Table of content

|                                                                                                          |    |
|----------------------------------------------------------------------------------------------------------|----|
| 1. Flow diagram of study selection procedure, numerical data about the inclusion and exclusion protocol. | 2  |
| 2. Detailed characteristics of all included studies.                                                     | 3  |
| 3. Distribution of the analyzed parameters in meta-analysis.                                             | 6  |
| 4. Detailed results of meta-analysis of physiological parameters:                                        | 7  |
| 4.1. <i>Gymnema montanum</i> analysis results.                                                           | 7  |
| 4.2. <i>Gymnema montanum</i> vs. Glibenclamide analysis results.                                         | 8  |
| 4.3. <i>Momordica charantia</i> analysis results.                                                        | 9  |
| 4.4. <i>Moringa oleifera</i> analysis results.                                                           | 10 |
| 5. Detailed results of meta-analysis of Oxidative status parameters:                                     | 11 |
| 5.1. <i>Gymnema montanum</i> analysis results.                                                           | 11 |
| 5.2. <i>Gymnema montanum</i> vs. Glibenclamide analysis results.                                         | 11 |
| 5.3. <i>Moringa oleifera</i> analysis results.                                                           | 12 |

1. Flow diagram of study selection procedure, numerical data about the inclusion and exclusion protocol.

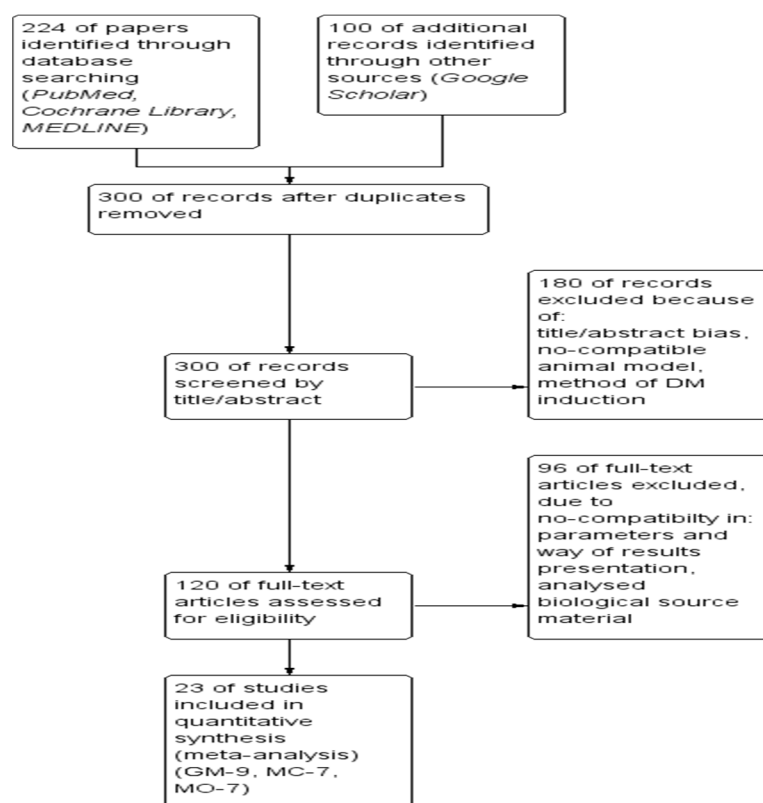

Figure S1. Flow diagram of study selection procedure, numerical data about the inclusion and exclusion protocol.

## 2. Detailed characteristics of all included studies.

| Study identifier [references] | Diabetes induction                                                                                                | Animals model                                                 | Outcomes                                                                                                                                                                                                          | Notes                                                                                                                                            |
|-------------------------------|-------------------------------------------------------------------------------------------------------------------|---------------------------------------------------------------|-------------------------------------------------------------------------------------------------------------------------------------------------------------------------------------------------------------------|--------------------------------------------------------------------------------------------------------------------------------------------------|
| Gymnema montanum (GM)         |                                                                                                                   |                                                               |                                                                                                                                                                                                                   |                                                                                                                                                  |
| Ananthan 2003                 | i.p. injection with freshly prepared solution of alloxan monohydrate in normal saline at a dose of 150 mg/kg BW.  | 36 Male albino Wistar rats 170–200 g BW                       | Glycaemia, Insulinaemia, T BARS and hydroperoxides in plasma, GSH, Vitamins C and E                                                                                                                               | Rats with that exhibited glycosuria and hyperglycaemia (i.e. glycaemia concentration 200–300 mg dl <sup>1</sup> ) were taken for the experiment. |
| Ananthan 2003a                | .p. injection with freshly prepared solution of alloxan monohydrate in normal saline at a dose of 150 mg/kg BW.   | 42 Male albino Wistar rats, body weight of 180 to 200 g.      | glycaemia, serum and tissue lipids, hexokinase, glucose-6-phosphatase, TBARS, hydroperoxides, and glutathione                                                                                                     | As above.                                                                                                                                        |
| Ananthan 2004                 | .p. injection with a freshly prepared solution of alloxan monohydrate in normal saline at a dose of 150 mg/kg BW  | 54 Male albino Wistar rats, with BW of 180 to 200 g           | glycaemia, insulinaemia, lipid peroxidation, reduced glutathione content and activities of CAT, SOD, GPx, and GST.                                                                                                | As above.                                                                                                                                        |
| Ramkumar 2005                 | i.p. injection with STZ in citrate buffer (pH =4.5) at a dose of 100 mg/kg BW.                                    | 30 Male albino Wistar rats (170 to 200g each), aged 48 ± 2 h, | glycaemia, insulinaemia, lipid peroxidation, reduced glutathione content and activities of CAT, SOD, GPx, and GST.                                                                                                | After 12 wks, male rats weighing above 150 g were selected for screening in the NIDDM model.                                                     |
| Ramkumar 2007                 | i.p. injection with a freshly prepared solution of alloxan monohydrate in normal saline at a dose of 150 mg/kg BW | Male albino Wistar rats (BW, 170-200 g)                       | glycaemia, insulinaemia, OGTT and lasma/tissue glycoproteins, hexosamine, sialic acid, and fructose                                                                                                               | As above.                                                                                                                                        |
| Ramkumar 2008                 | i.p. injection with freshly prepared solution of alloxan monohydrate in normal saline at a dose of 150 mg/kg BW   | 42 Male albino Wistar rats of 170–200 g BW                    | Glycaemia, OGTT, insulinaemia, TBARS, MDA, and Hydroperoxides, SOD, GPx, and CAT activities                                                                                                                       | As above.                                                                                                                                        |
| Ramkumar 2008a                | i.p. injection with freshly prepared solution of alloxan monohydrate in normal saline at a dose of 150 mg/kg BW   | Male adult albino Wistar rats, 12 wks old, BW 180–            | lipid profile, lipoprotein changes and fatty acid composition, TC, TG, FFA, The ratio between HMG-CoA and mevalonate in hepatic tissue as an index of the activity of HMG-CoA reductase                           | As above.                                                                                                                                        |
| Ramkumar 2009                 | Diabetes was induced in the rats and administering alloxan.                                                       | 30 Male albino Wistar rats of 170–200 g BWs                   | glycaemia, insulinaemia, renal markers including urea, creatinine and uric acid, lipid peroxidation markers including TBARS and hydroperoxides and antioxidant enzymes SOD, CAT, GPx and GST activities in kidney | As above.                                                                                                                                        |
| Ramkumar 2011                 | Single i.p. injection of STZ (60 mg/kg bw). Control animals received only citrate buffer                          | 48 Male albino Wistar rats (170–200 g BW)                     | glycaemia levels and insulinaemia, activity of hexokinase, Glucose-6-phosphate dehydrogenase and glycogen content in liver, levels of glucose-6-phosphatase and fructose-1,6-bisphosphatase.                      | injection, animals with fasting glycaemia above 250 mg/dl were considered as diabetic and included in the                                        |

| Study identifier [references]   | Diabetes induction                                                                                                                         | Animals model                                                                                 | Outcomes                                                                                                                                                                                                                                                       | Notes                                                                                                                                    |
|---------------------------------|--------------------------------------------------------------------------------------------------------------------------------------------|-----------------------------------------------------------------------------------------------|----------------------------------------------------------------------------------------------------------------------------------------------------------------------------------------------------------------------------------------------------------------|------------------------------------------------------------------------------------------------------------------------------------------|
| <b>Momordica charantia (MC)</b> |                                                                                                                                            |                                                                                               |                                                                                                                                                                                                                                                                |                                                                                                                                          |
| Atila 2015                      | i.p. injection with STZ                                                                                                                    | 40 Sprague Dawley rats, aged 5-6 months                                                       | Glycaemia TOS and TAS levels in plasma and erythrocytes, LDL, HDL, VLDL, TC, TG                                                                                                                                                                                | ----                                                                                                                                     |
| El Batran 2006                  | i.p. injection of 150 mg/kg of a 5% aqueous solution of alloxan                                                                            | adult albino rats of both sexes " Sprague–Dawley" weighing 120–150 g                          | Serum glucose, creatinine, urea, Serum alkaline Phosphatase, transaminases " AST and ALT" Serum TG and TC                                                                                                                                                      | ----                                                                                                                                     |
| Fernandes 2007                  | s.c., injection of alloxan monohydrate (100 mg/kg) in acetate buffer (pH 4.5).                                                             | 32 Albino rats of the Wistar strain, of either sex, weighing 150–200 g,                       | Glucose tolerance test, glycosylated haemoglobin, mean glycaemia, serum insulin, TC, TG, protein and glycogen content of liver. The hemidiaphragms and livers glucose uptake/transfer processes, Histopathological study of pancreas.                          | ----                                                                                                                                     |
| Kar 2003                        | i.p. injection of alloxan monohydrate to overnight fasted animals at a dose of 100 mg/kg BW by partially destroying pancreatic beta cells. | 160 Charles Foster strain male albino rats (BW. 150- 200 g) were used throughout the studies. | Glycaemia, Urine sugar                                                                                                                                                                                                                                         | Steady diabetes was confirmed noting urine sugar regularly and then measuring glycaemia values before starting an experiment.            |
| Mahmoud 2017                    | i.p. injection of a single dose of freshly prepared STZ (45 mg/kg) in citrate buffer (0.09 M, pH 4.8)                                      | Adult male albino rats (aged 6–8 wks) weighing 150–200 g                                      | glucose uptake of isolated rat diaphragm muscles in the presence and absence of insulin. Histopathological examination of pancreas; Serum glucose level, TC, TG and HDL-cholesterol levels, Serum insulin level, Serum fructosamine level, TAO, Pancreatic MDA | rats with persistent glycaemia levels 200 mg/dL, for 7 days after STZ administration, were considered diabetic and included in the study |
| Mhamady 2012                    | i.p. injection of a single dose of 100 mg/kg BW alloxan monohydrate dissolved in citrate buffer at pH 4.5.                                 | 50 adult male albino rats weighing about 120-160g                                             | OGTT, serum insulin, lipid profiles, HbA1c%, liver enzymes activity and glycogen content, intestinal absorption and diaphragm uptake of glucose and histopathological studies on the pancreas were evaluated, serum ALT and AST activity, and lipid profiles.  | Rats having serum glucose ranging from 180-300 mg/dl after 2 hours of glucose intake were only included in the experiment.               |
| Poonam 2013                     | i.p. injection with streptozotocin. (50 mg kg <sup>-1</sup> ) freshly prepared in 0.1M sodium citrate buffer.                              | 30 Healthy adult rats of wistar strain were used in the present study                         | Glycaemia, BW                                                                                                                                                                                                                                                  | The diabetic state was confirmed 48 h after STZ injection. Threshold value of fasting glycaemia was taken as >200 mg dl <sup>-1</sup> .  |

| Study identifier [References] | Diabetes induction                                                                                                                         | Animals model                                                                                 | Outcomes                                                                                                                   | Notes                                                                                                                                                            |
|-------------------------------|--------------------------------------------------------------------------------------------------------------------------------------------|-----------------------------------------------------------------------------------------------|----------------------------------------------------------------------------------------------------------------------------|------------------------------------------------------------------------------------------------------------------------------------------------------------------|
| <b>Morinea oleifera (MO)</b>  |                                                                                                                                            |                                                                                               |                                                                                                                            |                                                                                                                                                                  |
| Al-Maki 2015                  | i.v. injection of STZ(60mg/kg in 0.1mol/l citrate buffer), control group consisted of 10 rats injected with 0.1mol/L citrate buffer        | 40 adult male Albino rats weighing 180-200g                                                   | Glycaemia level, BW, SOD and CAT level in kidney tissue homogenate                                                         | Rats with glycaemia higher than 200mg/dL after the 5 days from injection was considered as diabetic.                                                             |
| Gupta 2012                    | i.p. injection with STZ (50mg/kg BW) control rats (3 groups of 7 animals) were injected with 0.1mmol/L                                     | 9 Colony bred, 28 sexually mature albino Wistar rats weighing 170-230g,                       | Glycaemia level, insulinaemia level                                                                                        | Rats were considered as diabetic when fasting glucose were >250mg/dL..                                                                                           |
| Jaiswal 2013                  | Single i.p. injection of freshly prepared STZ at a dose of 55 mg/kg BW                                                                     | 30 Male albino Wistar rats weighing 180-220 g                                                 | SOD, CAT, GST, LPO,                                                                                                        | Rats with marked hyperglycemia in terms of fasting blood glucose (FBC) and postprandial glucose (PPG) [FBC>250mg/dL and PPG>350mg/dL were used in the study].    |
| Kar 2003                      | i.p. injection of alloxan monohydrate to overnight fasted animals at a dose of 100 mg/kg BW by partially destroying pancreatic beta cells. | 160 Charles Foster strain male albino rats (wt. 150- 200 g) were used throughout the studies. | Glycaemia, Urine sugar                                                                                                     | Steady diabetes was confirmed noting urine sugar regularly and then measuring glycaemia values before starting an experiment.                                    |
| Olurishie 2016                | single i.p. injection with alloxan, dose of 150mg/kg BW administered i.p.                                                                  | 56 Wistar rats of both sexes                                                                  | Glycaemic control parameters, insulin level, BWs, lenticular morphology                                                    | Rats with the glycaemia level greater than 150mg/dL were considered diabetic, rats with glycaemia over 250mg/dL were considered as post-prandial hyperglycaemic. |
| Omabe 2014                    | i.p. injection with alloxan Monohydrate dissolved in sterile PBS of dose 84mg/kg                                                           | Adults albino rats of both sexes and the same age group (8–12 wks) weighing 130–200 g         | Glycaemia Level, Electrolytes Determinatio, Plasma Bicarbonate, Lactate Dehydrogenase Level,                               | only animals with fasting blood glucose 11–20mmol/L were considered diabetic used for the experiment.                                                            |
| Omodanisi 2017                | i.p. injection of single dose of streptozotocin (55 mg/kg)                                                                                 | forty-eight (48) adult male Wistar strain                                                     | MDA levels, CAT, GPx, SOD activities, GSH and inflammatory biomarkers TNF- $\alpha$ , IL-6) were determined in the kidney. | ---                                                                                                                                                              |

### 3. Distribution of the analyzed parameters in meta-analysis.

Table S1. Distribution of analysed parameters in meta-analysis.

| Plant                      | Physiological efficacy parameters                                                                       |                                                               | Oxidative stress parameters              |                             |
|----------------------------|---------------------------------------------------------------------------------------------------------|---------------------------------------------------------------|------------------------------------------|-----------------------------|
|                            | <i>vs control</i>                                                                                       | <i>vs drug</i>                                                | <i>vs control</i>                        | <i>vs drug</i>              |
| <i>Gymnema montanum</i>    | glycemia ↓<br>insulinemia ↑<br>body weight ↑<br>food intake ↓                                           | glycemia ↓<br>insulinemia ↓<br>body weight ↔<br>food intake ↓ | TBARS ↓<br>hydroperoxides ↓              | TBARS ↓<br>hydroperoxides ↓ |
| <i>Momordica charantia</i> | <b>vs. control</b><br><br>glycemia ↓<br>insulinemia ↑<br>body weight ↔<br>glucose uptake by diaphragm ↑ |                                                               | No parameters analyzed Ø                 |                             |
| <i>Moringa oleifera</i>    | <b>vs. control</b><br><br>glycemia ↓<br>insulinemia ↔<br>body weight ↑                                  |                                                               | <b>vs. control</b><br><br>SOD ↓<br>CAT ↑ |                             |

## 5. Detailed results of meta-analysis of physiological parameters

### 5.1. *Gymnema montanum* analysis results.

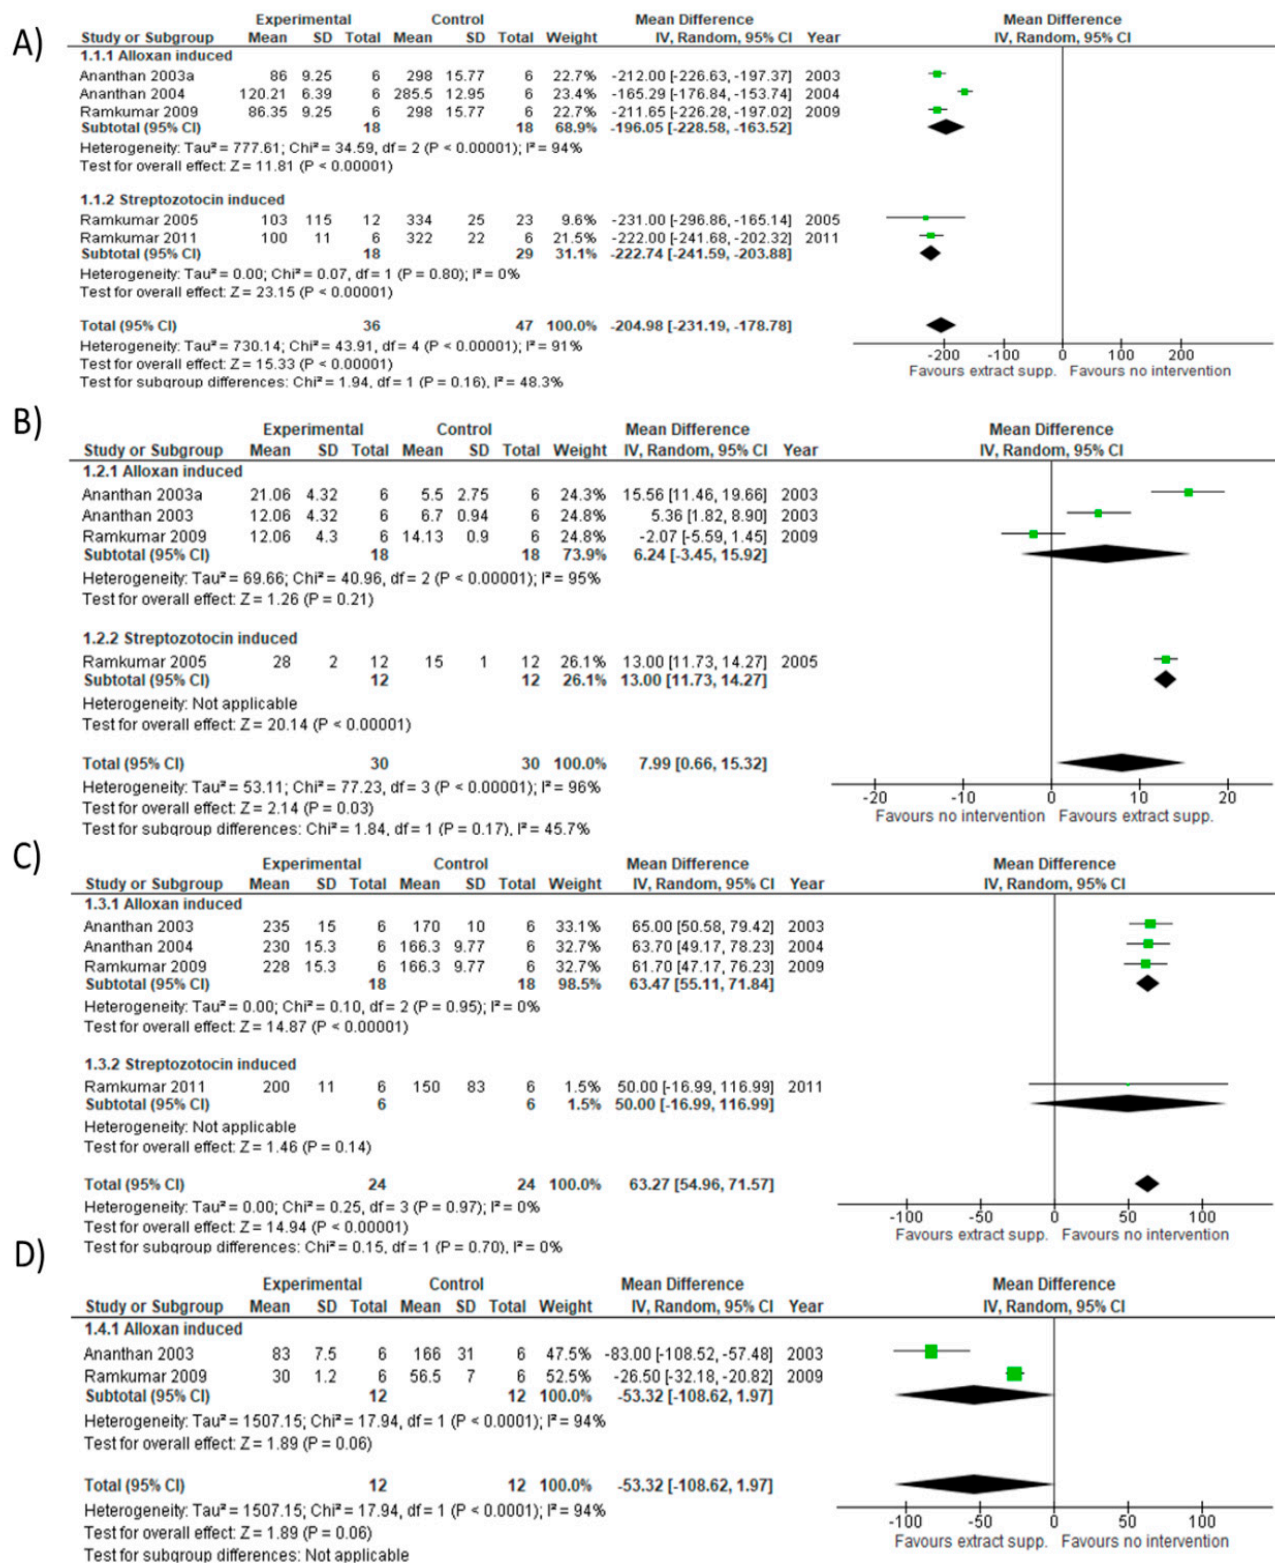

Figure S2. Results of meta-analysis of physiological parameters for *Gymnema montanum* extract:  
A) Glycemia, B) Insulinemia, C) Change in Body weight, D) Food intake.



## 5.2. *Gymnema montanum* vs. *Glibenclamide* analysis results.

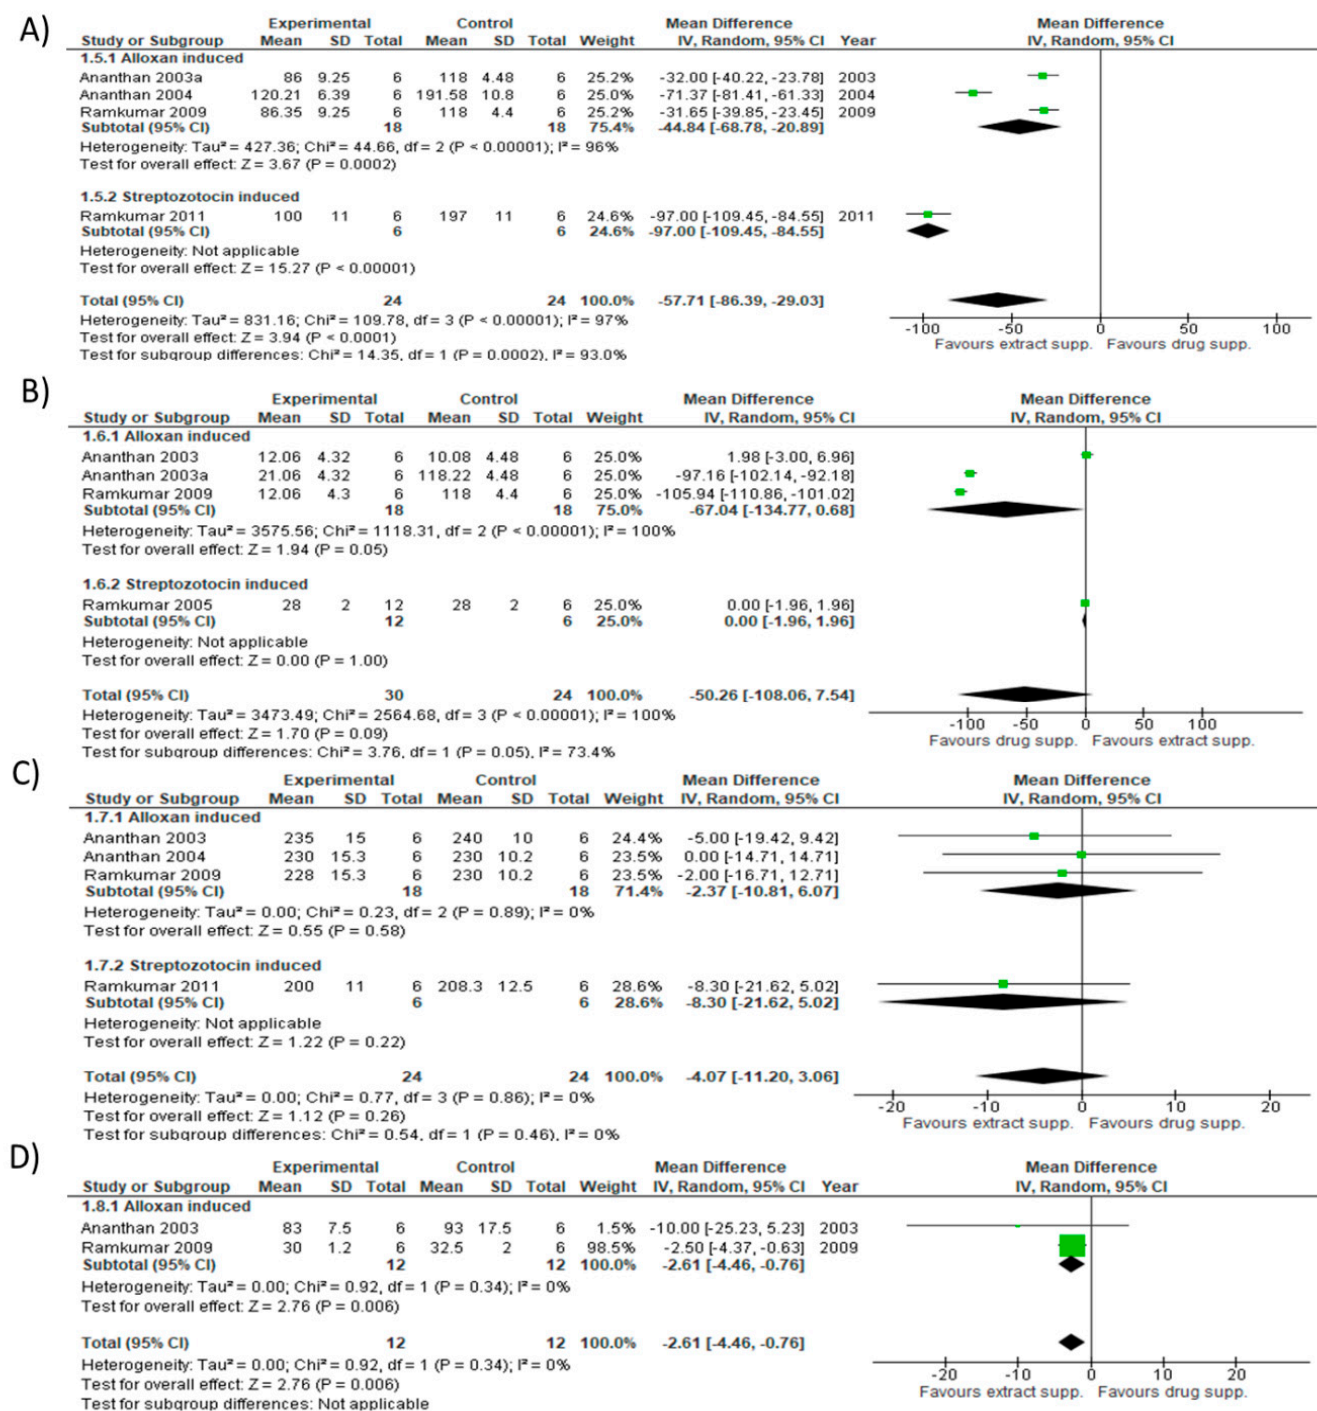

Figure S3. Results of meta-analysis of physiological parameters for *Gymnema montanum* extract comparison with Glibenclamide: A) Glycemia, B) Insulinemia, C) Change in Body weight, D) Food intake.



### 5.3. *Momordica charantia* analysis results.

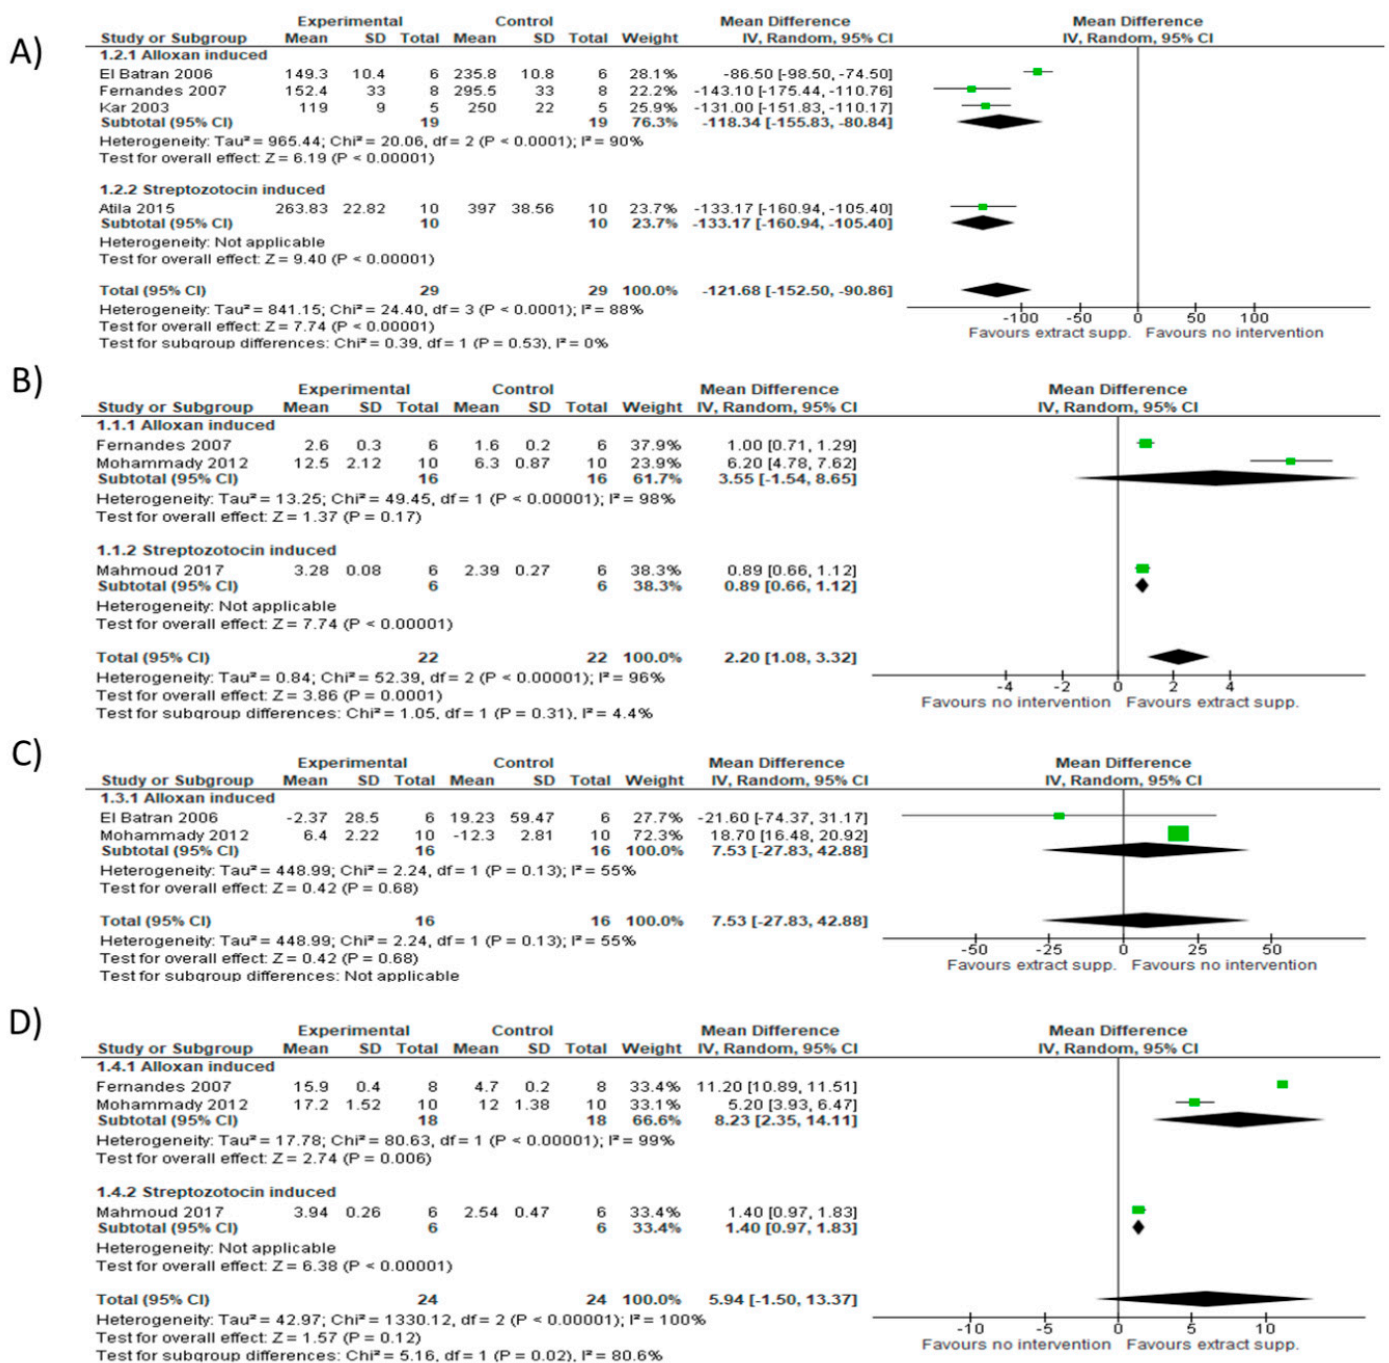

Figure S4. Results of meta-analysis of physiological parameters for *Momordica charantia* extracts: A) Changes in Glycemia, B) Changes in Insulinemia, C) Changes in Body weight, D) Glucose uptake by the diaphragm.

## 5.4. *Moringa oleifera* analysis results.

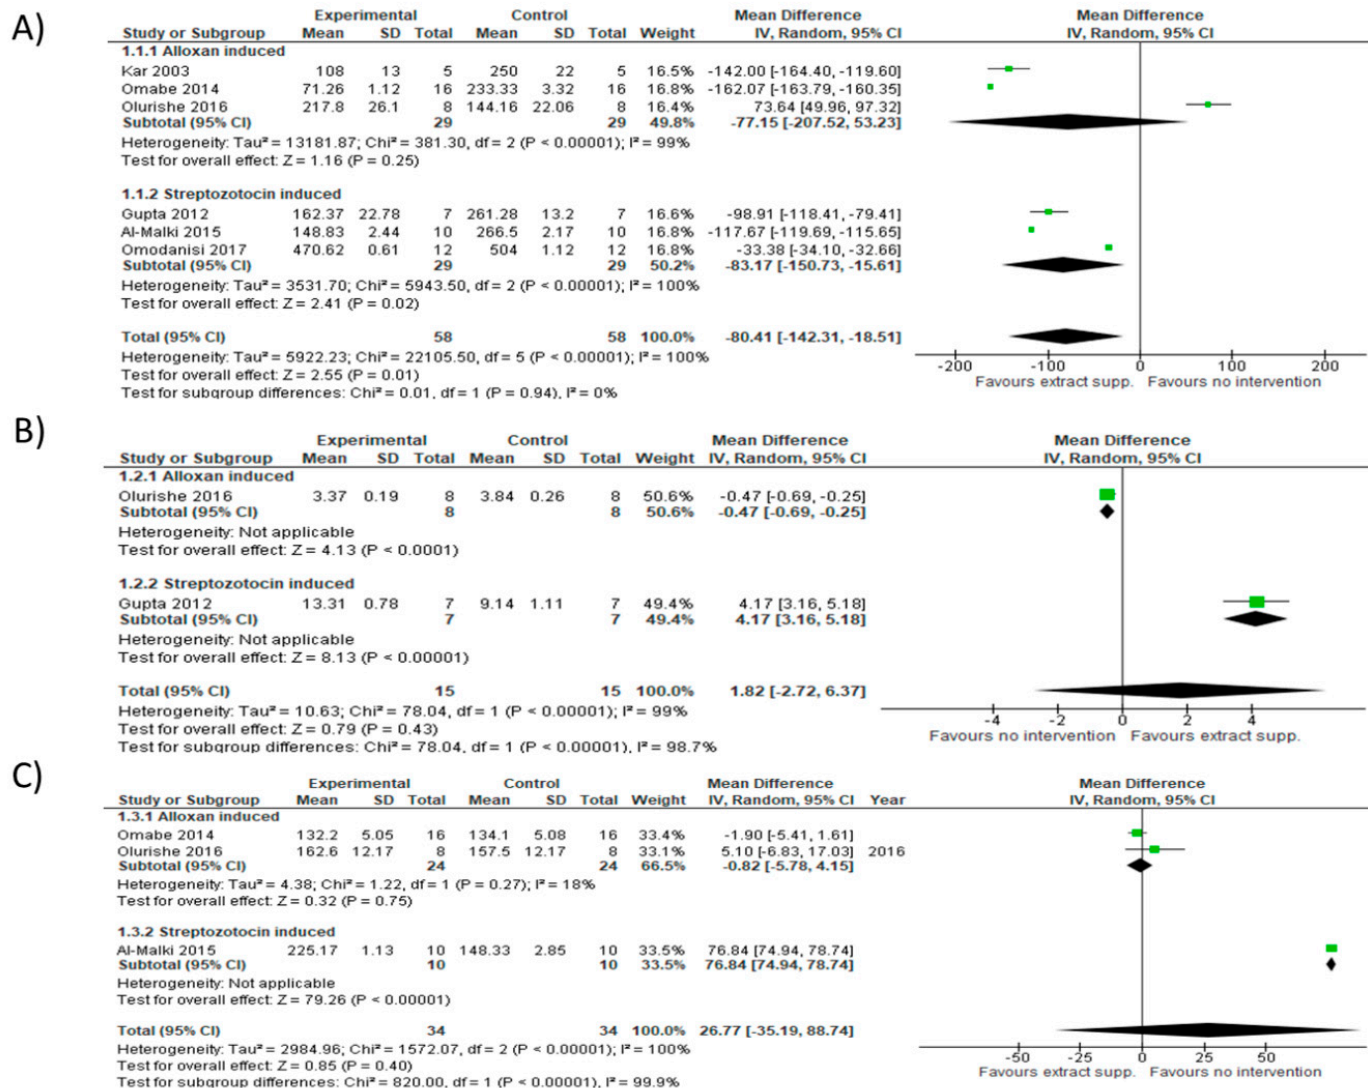

Figure S5. Results of meta-analysis of physiological parameters for *Moringa oleifera* extracts:

A) Changes in Glycemia, B) Changes in Insulinemia, C) Changes in Body weight.

## 6. Detailed results of meta-analysis of Oxidative status parameters:

### 6.1. *Gymnema montanum* analysis results.

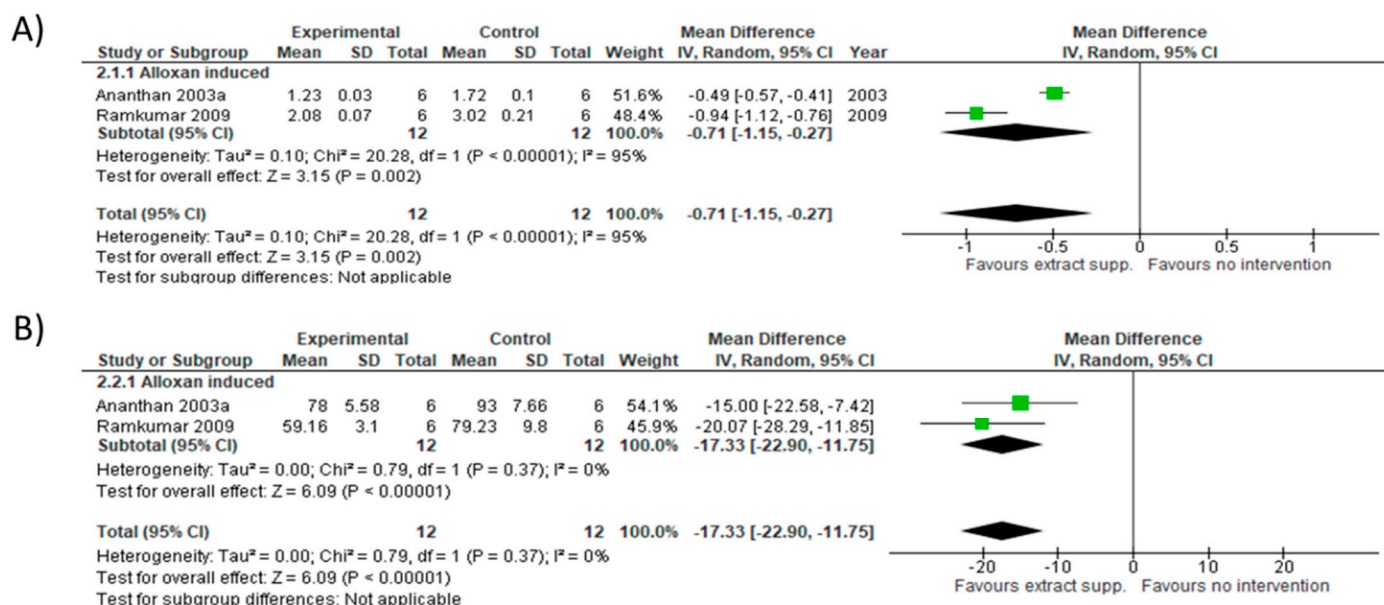

Figure S6. Results of meta-analysis of oxidative status parameters for *Gymnema montanum* extracts: A) Change in TBARS level, B) Change in Hydroperoxides level.

### 6.2. *Gymnema montanum* vs. Glibenclamide analysis results.

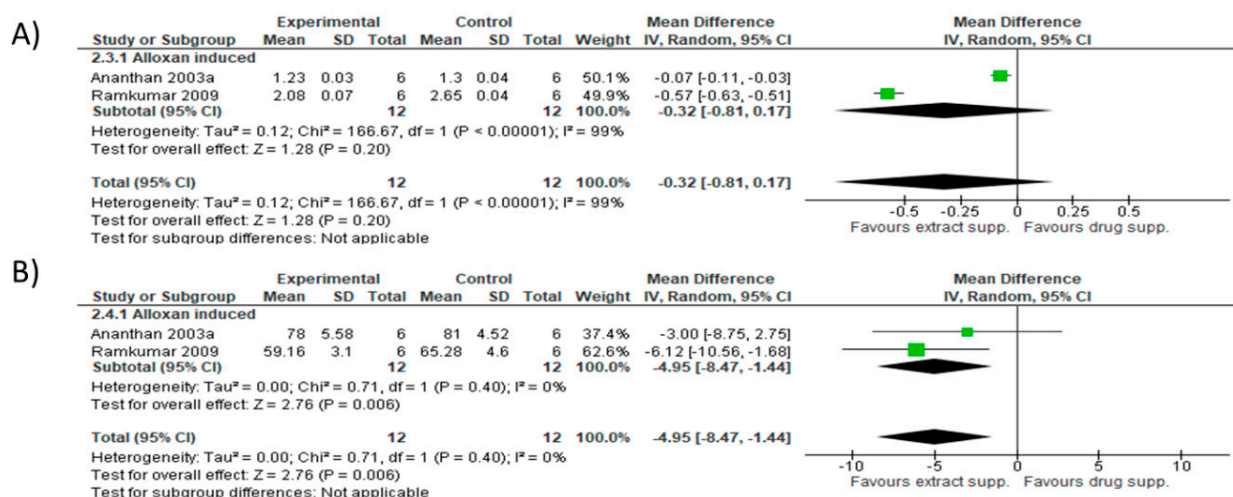

Figure S7. Results of meta-analysis of oxidative status parameters for *Gymnema montanum* extracts in comparison with Glibenclamide: A) Changes in TBARS level, B) Changes in Hydroperoxides level.

## 6.4. *Moringa oleifera* analysis results.

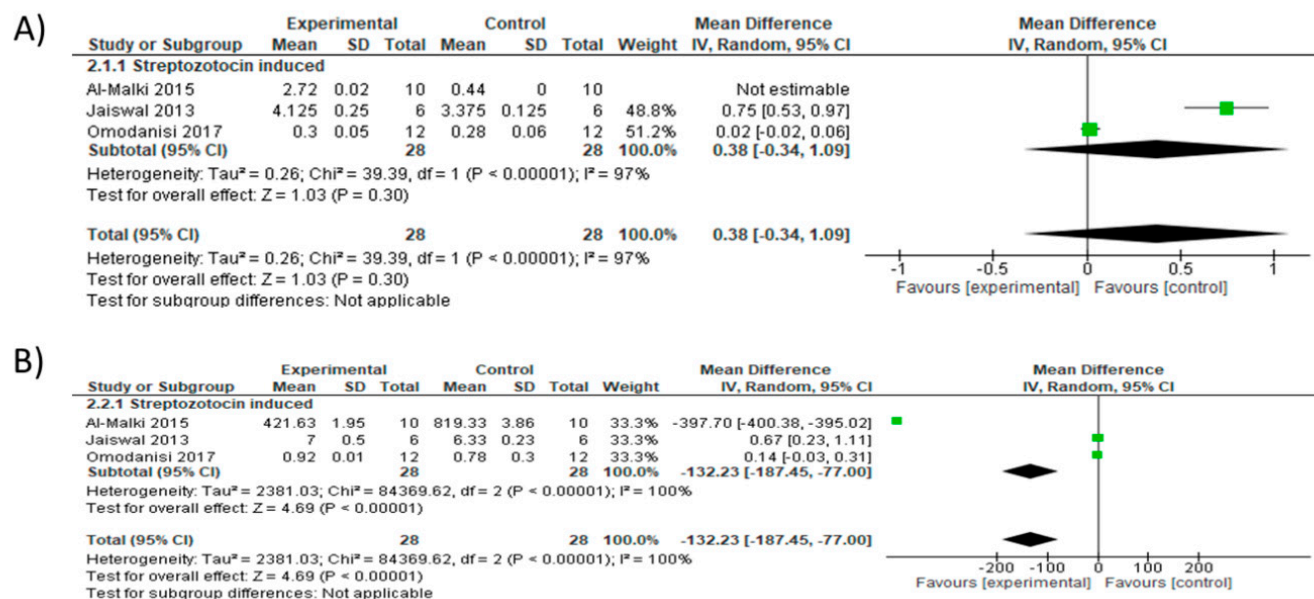

Figure S8. Results of meta-analysis of oxidative status parameters for *Moringa oleifera* extracts: A) Changes in CAT activity, B) Changes in SOD activity.
